# Supplementary material for: Surface crystal feature-dependent photoactivity of ZnO–ZnS composite rods via hydrothermal sulfidation
Source: Royal Society of Chemistry journal article supplement (doi:10.1039/c7ra13061a), 2018-01-01
Supplement: c7ra13061a1.pdf [file c7ra13061a1.pdf]

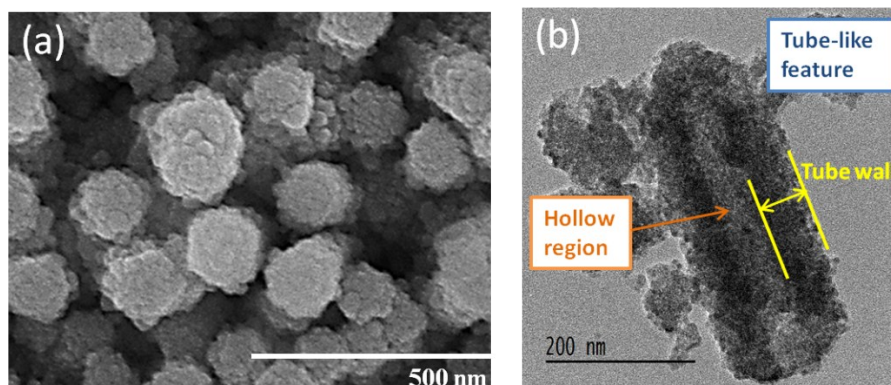

Fig. S1 (a) SEM image of the ZnO rods treated with 4-h sulfidation. (b) TEM image of the ZnO rod treated with 4-h sulfidation wherein the ZnO rod transformed into ZnS tube.

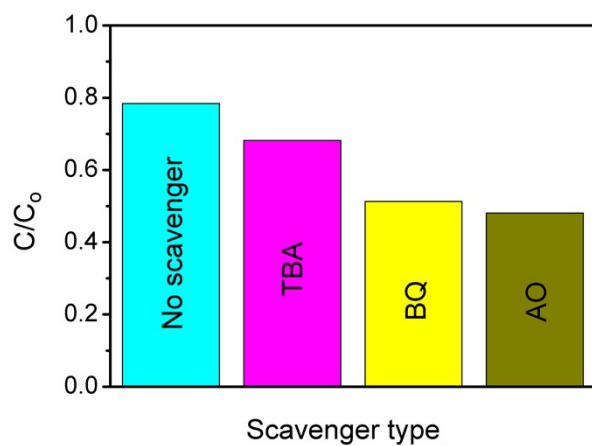

Fig. S2 The effects of various scavengers for the photocatalytic degradation of MB solution using ZnO-ZnS-3 for 75 min.
